# Supplementary material
Source: MDPI journal article supplement (https://www.mdpi.com/2673-6209/2/2/16)
Supplement: s1 [file s1 › macromol-1752324-supplementary.pdf]

## **Supporting informations**

### **Poly(L-lactide) epimerization and chain scission in the presence of organic bases**

Julie Meimoun,<sup>a</sup> Audrey Favrelle-Huret,<sup>a</sup> Julien De Winter,<sup>b</sup> Philippe Zinck<sup>a\*</sup>

<sup>a</sup> Univ. Lille, CNRS, Centrale Lille, Univ. Artois, UMR 8181 - UCCS - Unité de Catalyse et Chimie du Solide, F-59650 Villeneuve d'Ascq, France. [philippe.zinck@univ-lille.fr](mailto:philippe.zinck@univ-lille.fr)

<sup>b</sup> Interdisciplinary Center for Mass Spectrometry, Organic Synthesis and Mass Spectrometry Laboratory, University of Mons - UMONS, 23 Place du Parc, 7000 Mons, Belgium

## MALDI ToF analyses

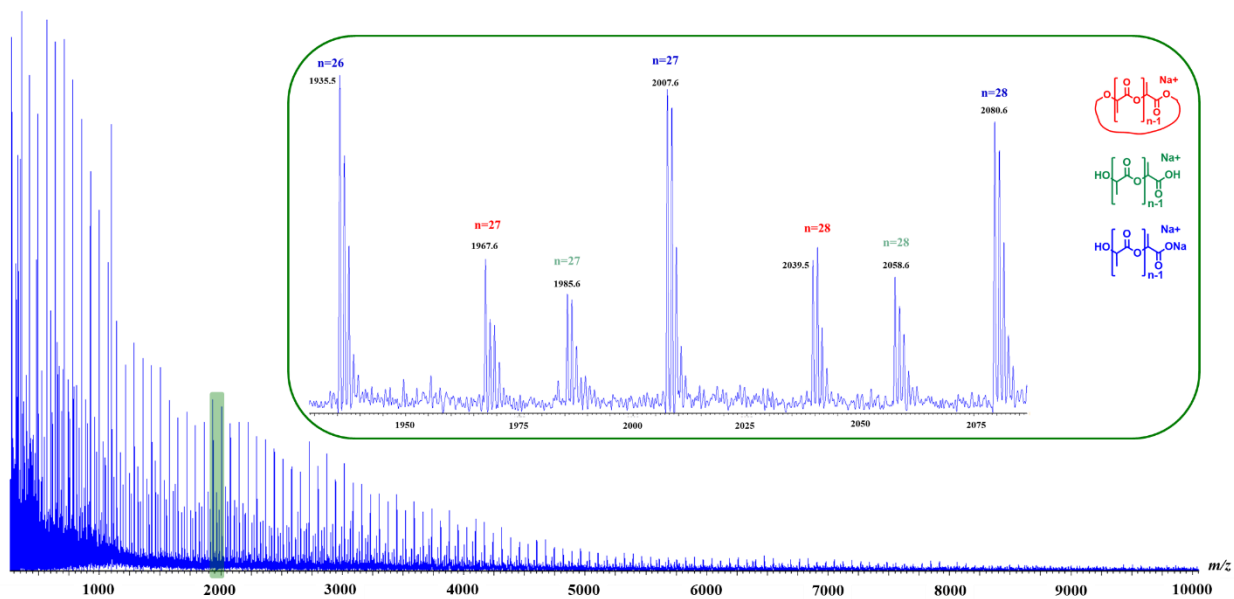

Figure S1. MALDI ToF analysis of entry 4 (DBU as catalyst)

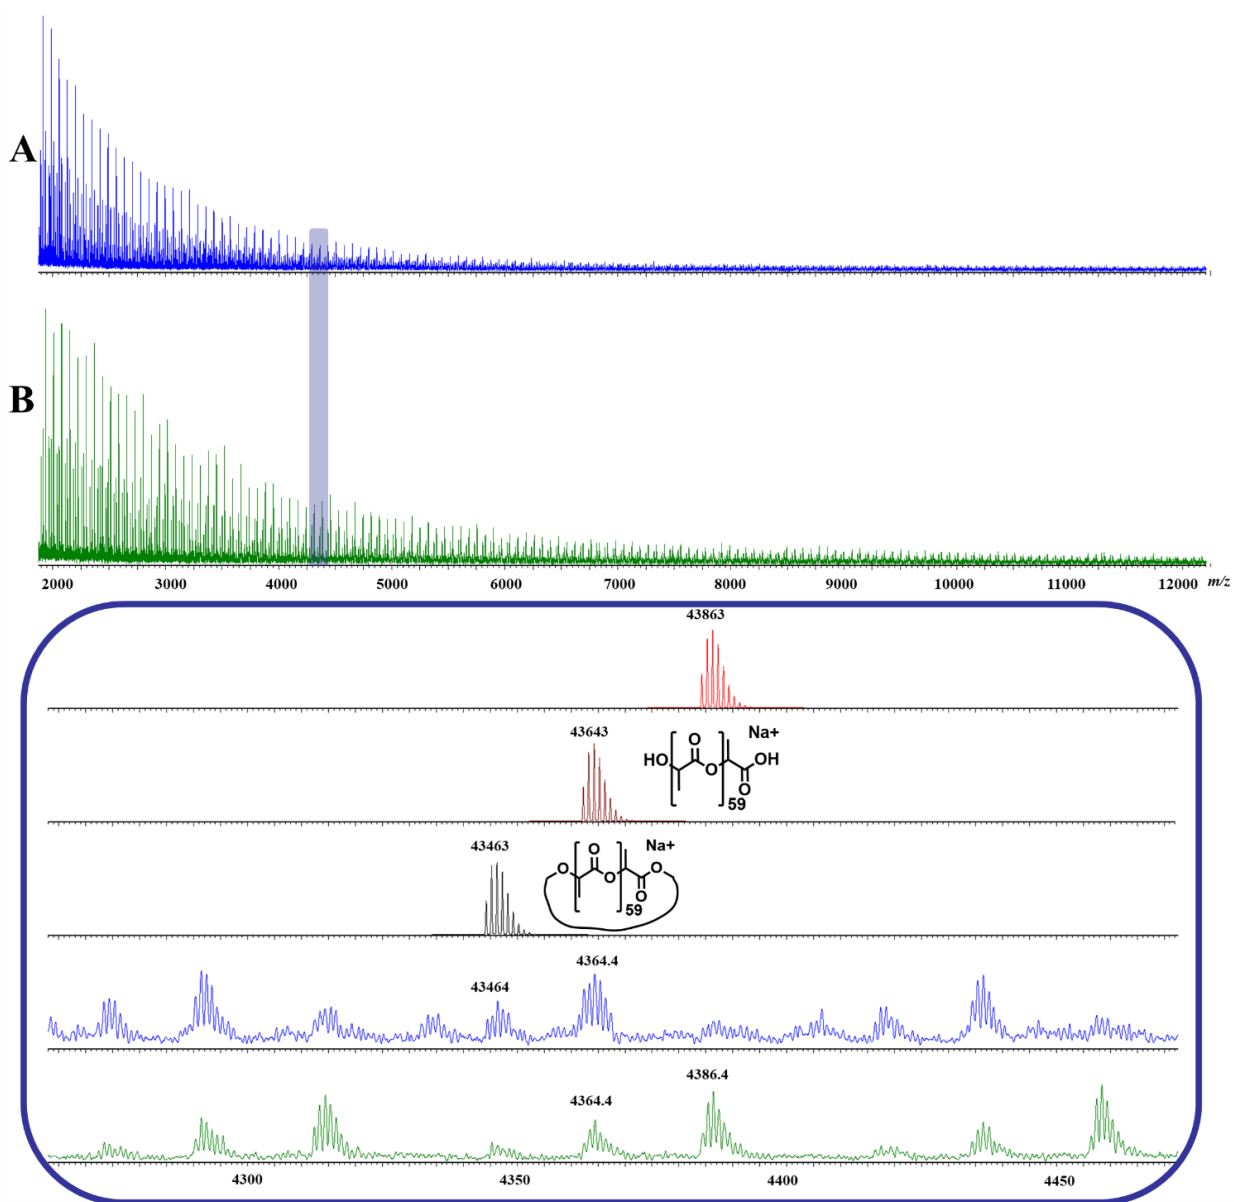

Figure S2. MALDI ToF analyses of the PLLA precursor (A, blue) and a PLA after epimerization (entry 11, B, green) with *t*-BuP<sub>4</sub> as the catalyst

## PLA acetylation and resulting experiments

Hydroxyl-ended PLLA is acetylated in the presence of triethylamine and acetyl chloride to obtain acetate end-capped PLLA. The reaction is quantitative as shown by  $^1\text{H}$  NMR (Figure S3). Indeed, the  $\text{CH-OH}$  chain end signal (at 4.4 ppm) of the precursor is not detected on the acetylated PLA spectrum and new signal appears at 2.2 ppm represented  $\text{CH}_3\text{-CO-O}$  of the new chain end group. The evolution of the microstructure of the hydroxyl-ended PLLA and the acetate-ended PLLA after 24h of stirring in toluene at  $105^\circ\text{C}$  with 0.65 mol% of  $t\text{-BuP}_4$  is presented in Table S1. The resulting number-average molecular weight is of the same order of magnitude, suggesting that the cleavage is not due to depolymerization and cyclization initiated by the PLA hydroxyl end-group.

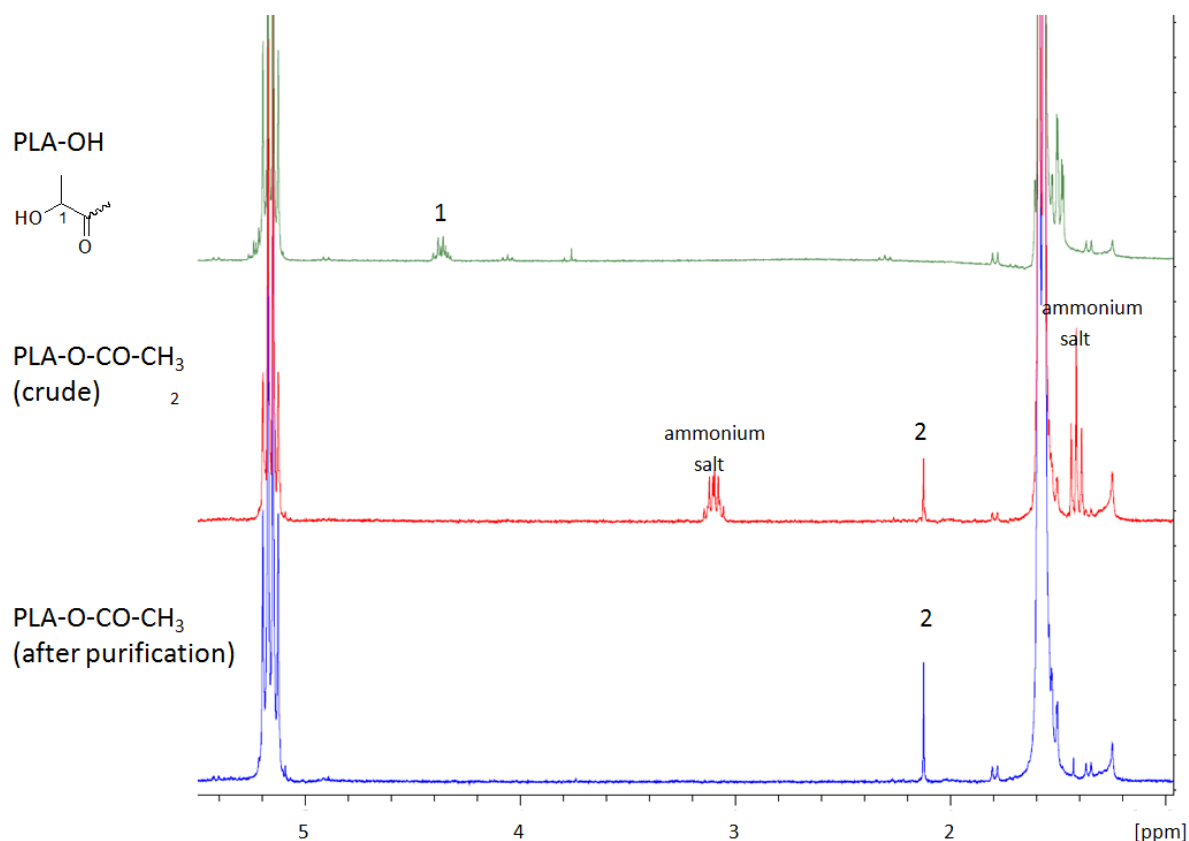

Figure S3  $^1\text{H}$  NMR spectra of PLLA-OH, and acetate end capped PLLA before and after purification in  $\text{CDCl}_3$ , 300 MHz.

Table S1.

Reaction of OH end-capped PLLA and acetate end-capped PLLA with a phosphazene <sup>a</sup>

|                        |                  | Entry | Yield (%) | $[\alpha]_D^{20}$ (°) | Epimerization D(%) <sup>c</sup> | $M_n$ corrected (g/mol) <sup>d</sup> | $\bar{M}_w$ |
|------------------------|------------------|-------|-----------|-----------------------|---------------------------------|--------------------------------------|-------------|
| OH end-capped PLA      | Starting polymer | -     | /         | -153.3                | 0                               | 61 000                               | 1.6         |
|                        | After reaction   | 15    | 96        | -134.6                | 6.1                             | 10 100                               | 1.8         |
| acetate end-capped PLA | Starting polymer | -     | /         | -151.8                | 0.5                             | 63 000                               | 1.7         |
|                        | After reaction   | 22    | 86        | -118.6                | 11.3                            | 12 400                               | 1.9         |

<sup>a</sup> *t*-BuP<sub>4</sub> (0.65 mol%), in anhydrous toluene at 105°C, 24h<sup>b</sup> Specific optical rotation determined by polarimetry (chloroform, 20 °C,  $\lambda$  = 598 nm, standard deviation  $\pm$  2.5 °)<sup>c</sup> Determined with equation 2 (standard deviation  $\pm$  0.6%)<sup>d</sup>  $M_n$  corrected =  $M_n$  SEC x 0.58, SEC (THF, standard PS, 40 °C)

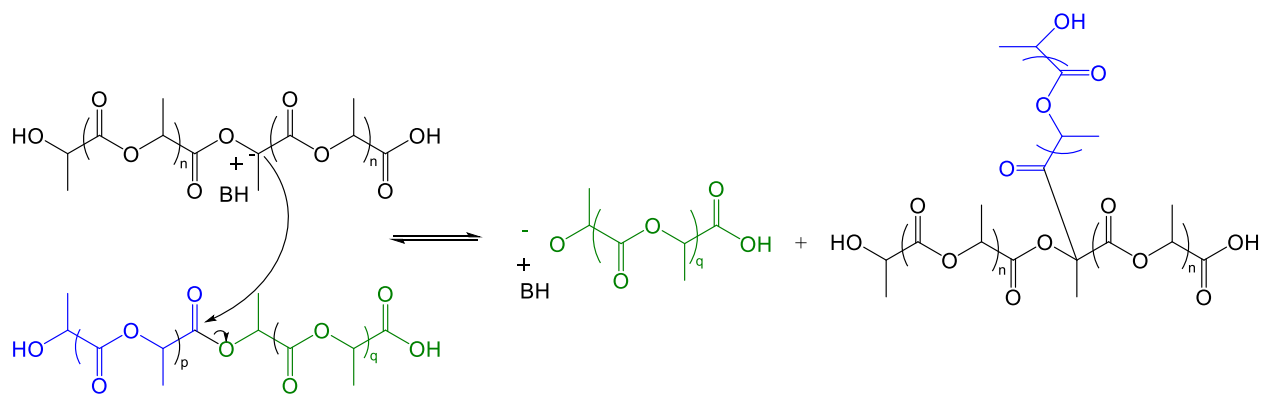

Figure S4. Hypothetical anionic / enolate mechanism

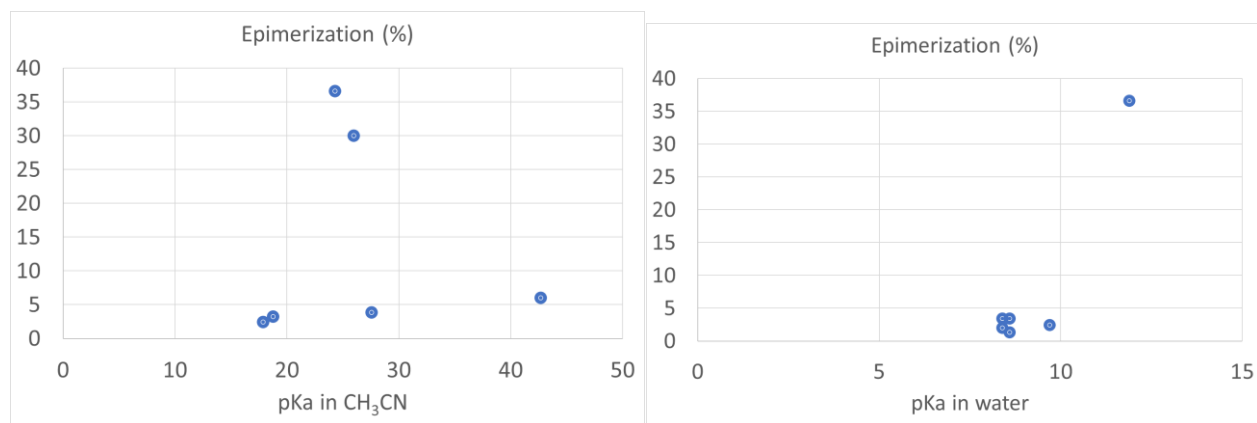

Figure S5. Influence of the pKa on the epimerization rate

## Influence of the water content

We did experiments with non-purified toluene, *i.e* a solvent containing more water, using TBD, DBU and DMAP as selected catalyst. The results are given below in Table S2.

Table S2. Epimerization of poly(L-lactide) in the presence of an organic base as catalyst. Influence of solvent purification <sup>a</sup>.

| Entry | Catalyst      | solvent      | $[\alpha]_D^{20}$ (°) <sup>b</sup> | Epimerization<br>D(%) <sup>c</sup> | $M_n$ corrected (g/mol) | $\bar{D}_M$ <sup>d</sup> |
|-------|---------------|--------------|------------------------------------|------------------------------------|-------------------------|--------------------------|
|       | Starting PLLA | -            | -162.3                             | 0                                  | 35 400                  | 1.7                      |
| 1     | No catalyst   | -            | -159.4                             | 0.9                                | 33 500                  | 1.8                      |
| 3     | DMAP          | Purified     | -154.5                             | 2.4                                | 19 200                  | 1.8                      |
| SI1   | DMAP          | Non purified | -150                               | 3.8                                | 17 400                  | 1.8                      |
| 4     | DBU           | Purified     | -43.5                              | 36.6                               | 5 800                   | 1.5                      |
| SI2   | DBU           | Non purified | -107                               | 17.1                               | 5 200                   | 1.4                      |
| 5     | TBD           | Purified     | -64.9                              | 30                                 | 6 000                   | 1.6                      |
| SI3   | TBD           | Non purified | -100                               | 19.3                               | 5 800                   | 1.6                      |

<sup>a</sup> 1 mol% of catalyst, 0.5 g PLLA ( $M_n$  = 35 400 g/mol), 48h, T = 105 °C, anhydrous toluene (3 mL, 2.3 mol/L)

<sup>b</sup> Specific optical rotation determined by polarimetry (chloroform, 20 °C,  $\lambda$ = 598 nm, standard deviation  $\pm$  2.5 °)

<sup>c</sup> Determined with equation 2 (standard deviation  $\pm$  0.6%)

<sup>d</sup>  $M_n$  corrected =  $M_n$  SEC x 0.58,  $\bar{D}_M$  is the dispersity, SEC (THF, standard PS, 40 °C)

For all three catalysts, the resulting molecular weight is slightly lower, which can be explained by some slight hydrolysis reactions. Regarding the epimerization, there are significant differences for DBU and TBD, with a lower extent of epimerization using the non-purified solvent. This can be explained by a competitive interaction of the base with water *vs.* the -CH proton of PLA. For DMAP, the epimerization is already weak with the purified solvent, and there is no significant evolution with the as-received one. For lower amounts of water, we did a few experiments using PLA after azeotropic distillation, with TBD as the catalyst, and the results were similar to those obtained using our standard drying procedure.
